# Supplementary material for: Characterization of Movement Disorder Phenomenology in Genetically Proven, Familial Frontotemporal Lobar Degeneration: A Systematic Review and Meta-Analysis
Source: PubMed Central journal article supplement (PMC4839564; doi:10.1371/journal.pone.0153852), 2016-04-21

Supplementary figure 2. Publication bias for behavioural + cognitive onset

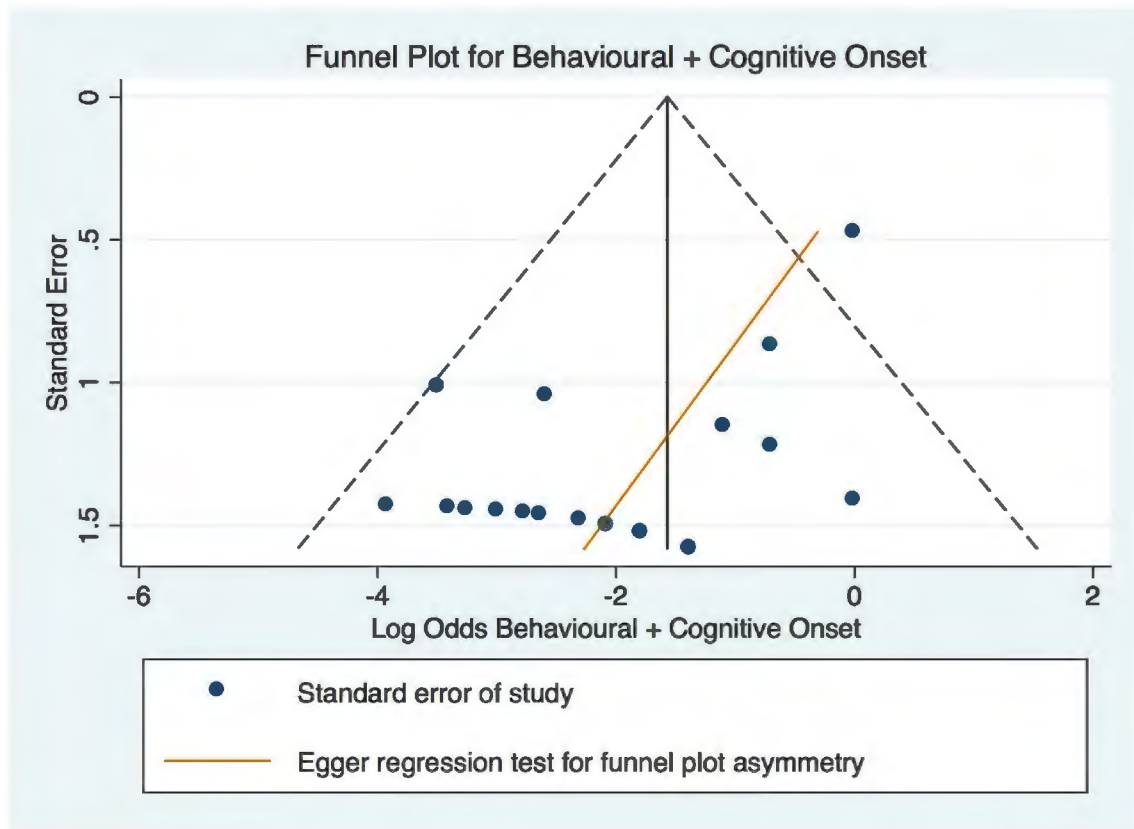

Supplement: pone.0153852.s002.pdf [file pone.0153852.s002.pdf]
