# Supplementary material for: Characterization of Movement Disorder Phenomenology in Genetically Proven, Familial Frontotemporal Lobar Degeneration: A Systematic Review and Meta-Analysis
Source: PubMed Central journal article supplement (PMC4839564; doi:10.1371/journal.pone.0153852), 2016-04-21

Supplementary figure 3. Publication bias for parkinsonism

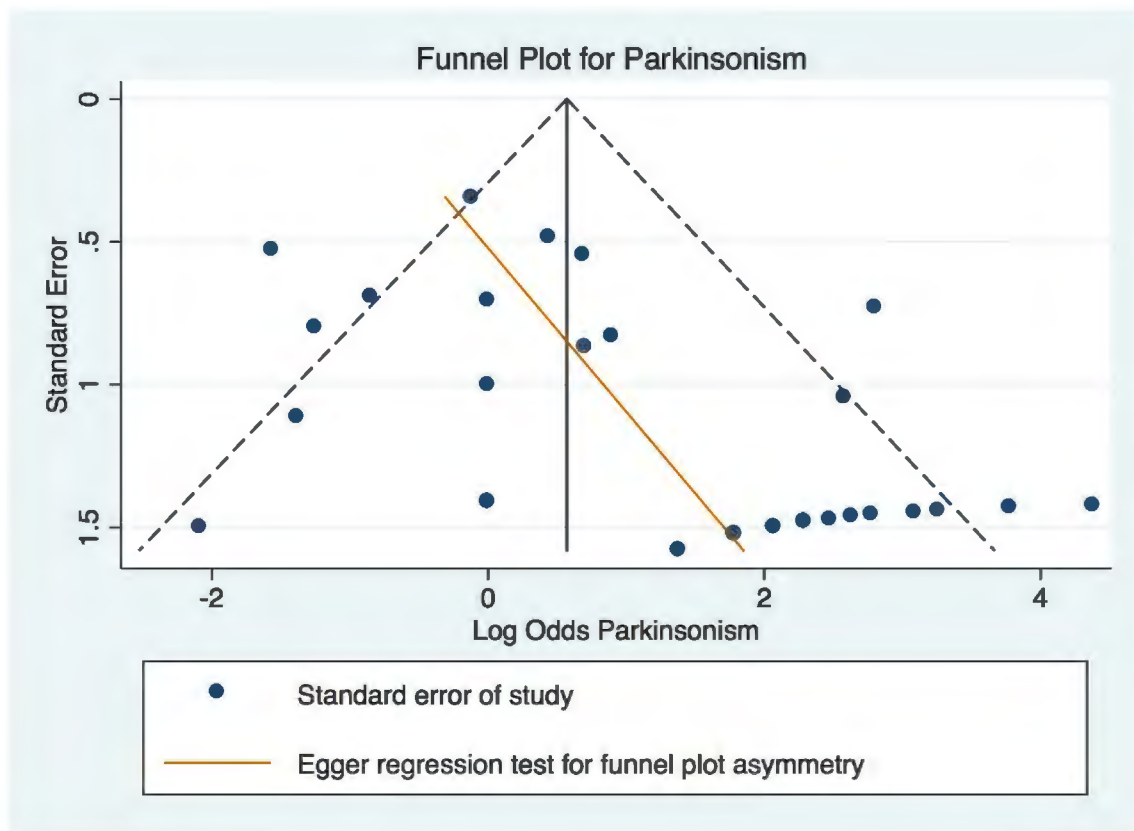

Supplement: pone.0153852.s003.pdf [file pone.0153852.s003.pdf]
